# Supplementary material
Source: PubMed Central journal article supplement (PMC2234127)

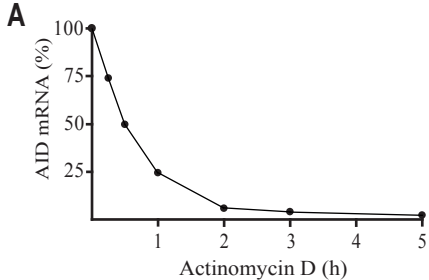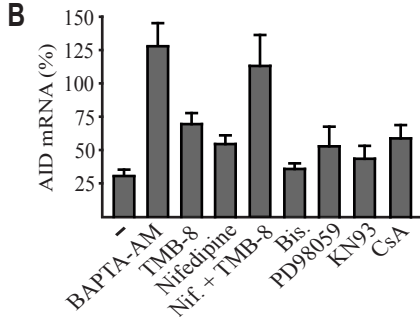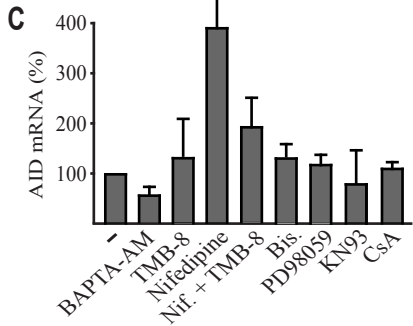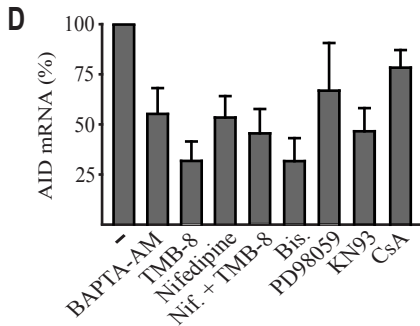

Supplement: pnas_0708220105_1.pdf [file pnas_0708220105_1.pdf]

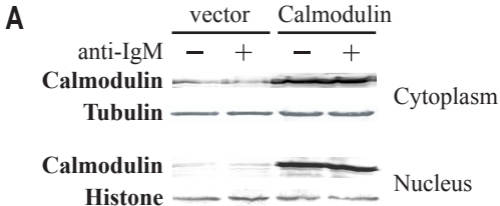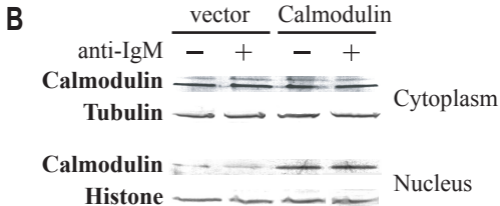

Supplement: pnas_0708220105_2.pdf [file pnas_0708220105_2.pdf]

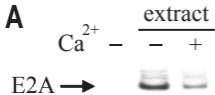

EMSA

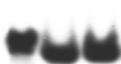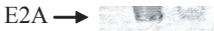

E2A Western

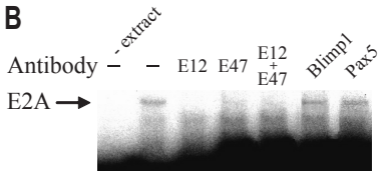

Supplement: pnas_0708220105_3.pdf [file pnas_0708220105_3.pdf]

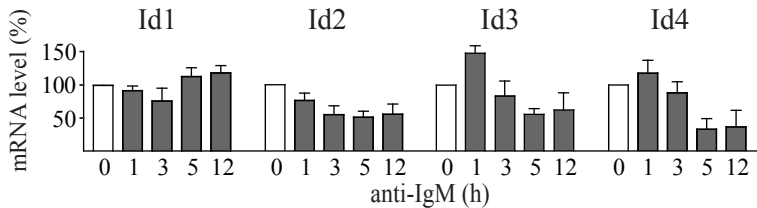

Supplement: pnas_0708220105_4.pdf [file pnas_0708220105_4.pdf]

**A**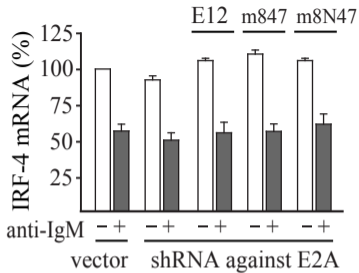**B**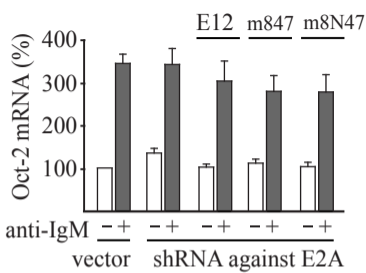**C**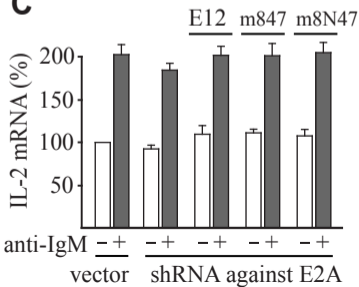**D**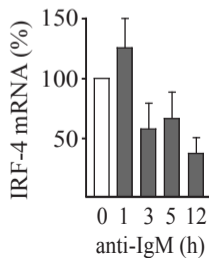**E**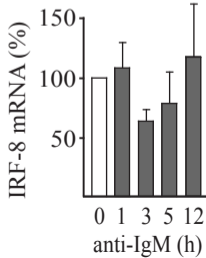

Supplement: pnas_0708220105_5.pdf [file pnas_0708220105_5.pdf]
